# Supplementary material for: IRF3 inhibits nuclear translocation of NF-κB to prevent viral inflammation
Source: PubMed Central journal article supplement — Proc Natl Acad Sci U S A. 2022 Sep 6;119(37):e2121385119. doi: 10.1073/pnas.2121385119 (PMC9478676; doi:10.1073/pnas.2121385119), 2022-09-06
Supplement: pnas.2121385119.sapp.pdf [file pnas.2121385119.sapp.pdf]

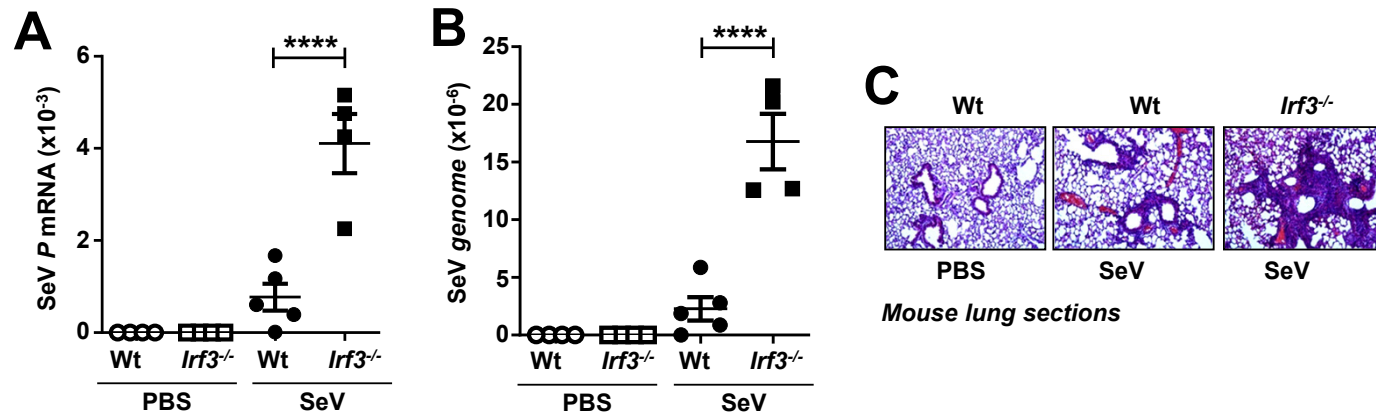

**Fig S1. Increased viral replication and inflammatory response in *Irf3*<sup>-/-</sup> mice in response to SeV infection. (A, B)** Wt or *Irf3*<sup>-/-</sup> mice were PBS-treated or infected with SeV, and the lungs were analyzed for viral RNA levels by qRT-PCR 5 dpi. **(C)** The H&E staining was performed on the lung sections of the PBS-treated and SeV-infected mice 5 dpi. The data represent mean  $\pm$  SEM, n = 3-5 for each mouse genotype and for each condition, as shown, \* represents p<0.05.

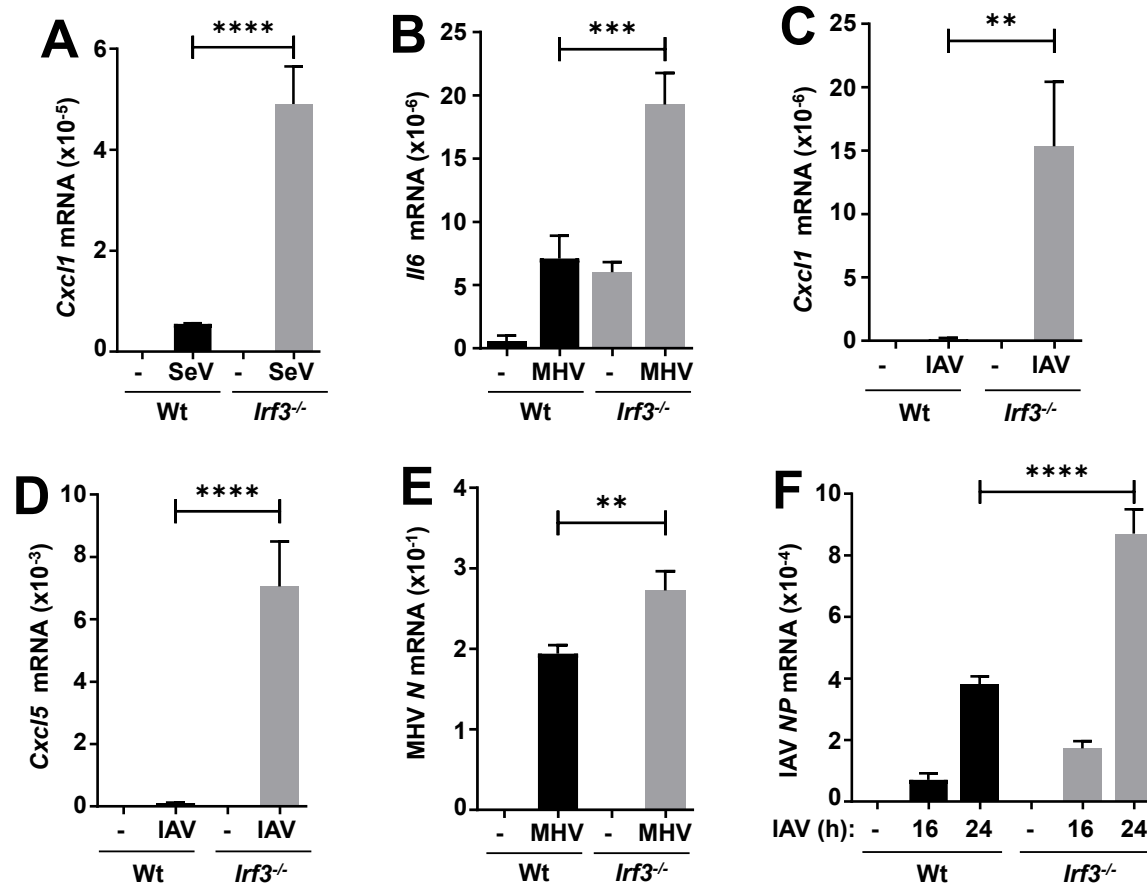

**Fig S2. Increased inflammatory gene expression in *Irf3*<sup>-/-</sup> mouse macrophages upon virus infection.** (A-F) Wt or *Irf3*<sup>-/-</sup> iBMDMs were infected with SeV (A, for 4 hpi), MHV (B, E, 16 h), or IAV (C, D, 16 hpi, F, as indicated), and the mRNAs of various inflammatory target genes (A-D) or viral genes (E, F) were analyzed by qRT-PCR. The results are representative of three experiments; the data represent mean  $\pm$  SEM, \* represents  $p < 0.05$ .

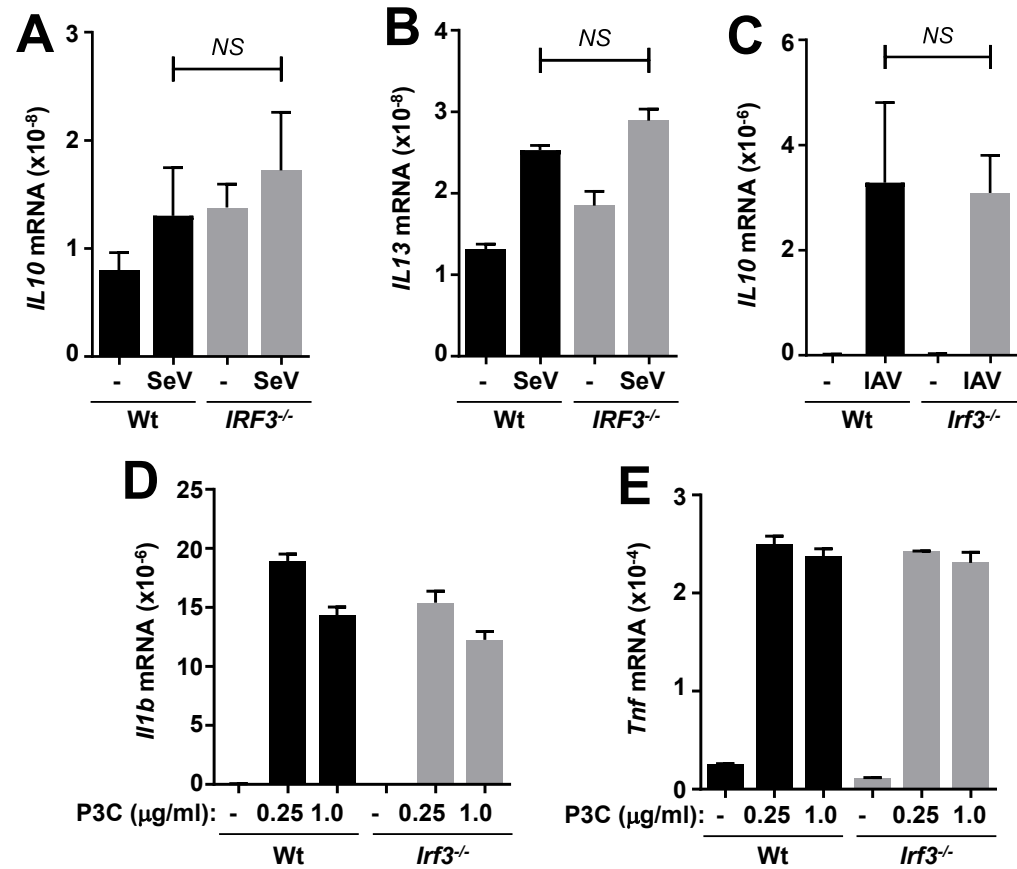

**Fig S3. Virus-induced anti-inflammatory genes or TLR2-induced pro-inflammatory genes are not elevated in IRF3-deficient cells.** (A, B) Wt and *IRF3*<sup>-/-</sup> HT1080 cells were infected with SeV (for 4 hpi) and *IL10* and *IL13* mRNA levels were analyzed by qRT-PCR. (C) Wt and *Irf3*<sup>-/-</sup> cells iBMDMs were infected with IAV (for 16 hpi) and the mRNA levels of *Il10* were analyzed by qRT-PCR. (D, E) Wt or *Irf3*<sup>-/-</sup> iBMDMs were treated with TLR2 ligand (Pam3CSK4, P3C) at the indicated doses for 8h, when the *Il1b* and *Tnf* mRNA levels were analyzed by qRT-PCR. The results are representative of three experiments; the data represent mean  $\pm$  SEM, \* represents  $p < 0.05$ .

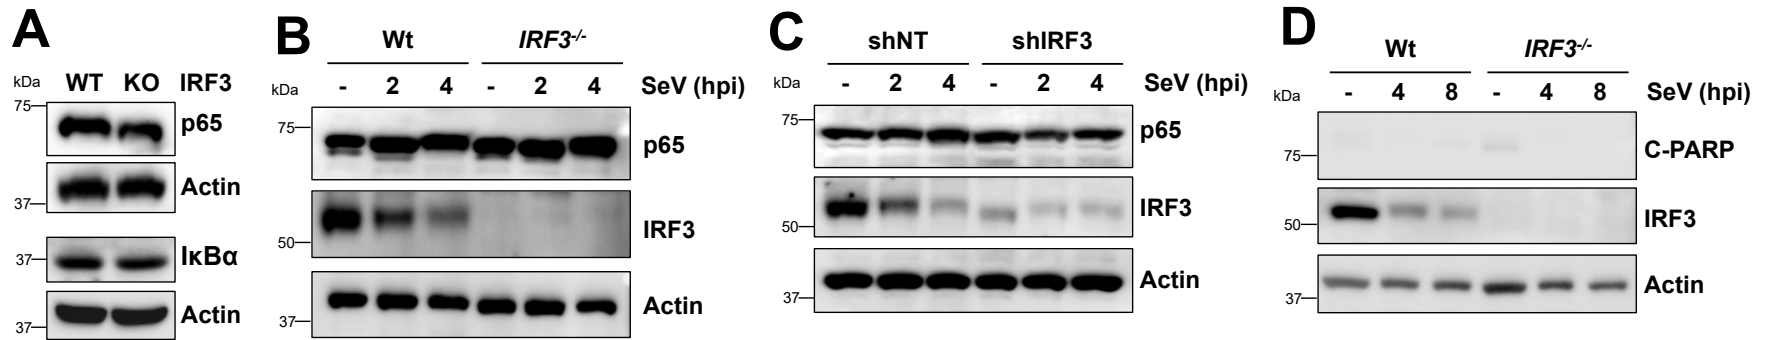

**Fig S4. IRF3 deficiency does not cause increased expression of NF-κB-p65 protein expression or apoptotic cell death.** (A) Expression of endogenous NF-κB-p65 and IκBα proteins were analyzed in Wt and *IRF3*<sup>-/-</sup> (KO) HT1080 cells by immunoblot. (B-D) Wt, *IRF3*<sup>-/-</sup> (B, D), or shIRF3 (C) cells were infected with SeV for the indicated time, when the NF-κB-p65 and IRF3 (B, C) or cleaved PARP (C-PARP, D) levels were analyzed by immunoblot. The results are representative of three experiments.

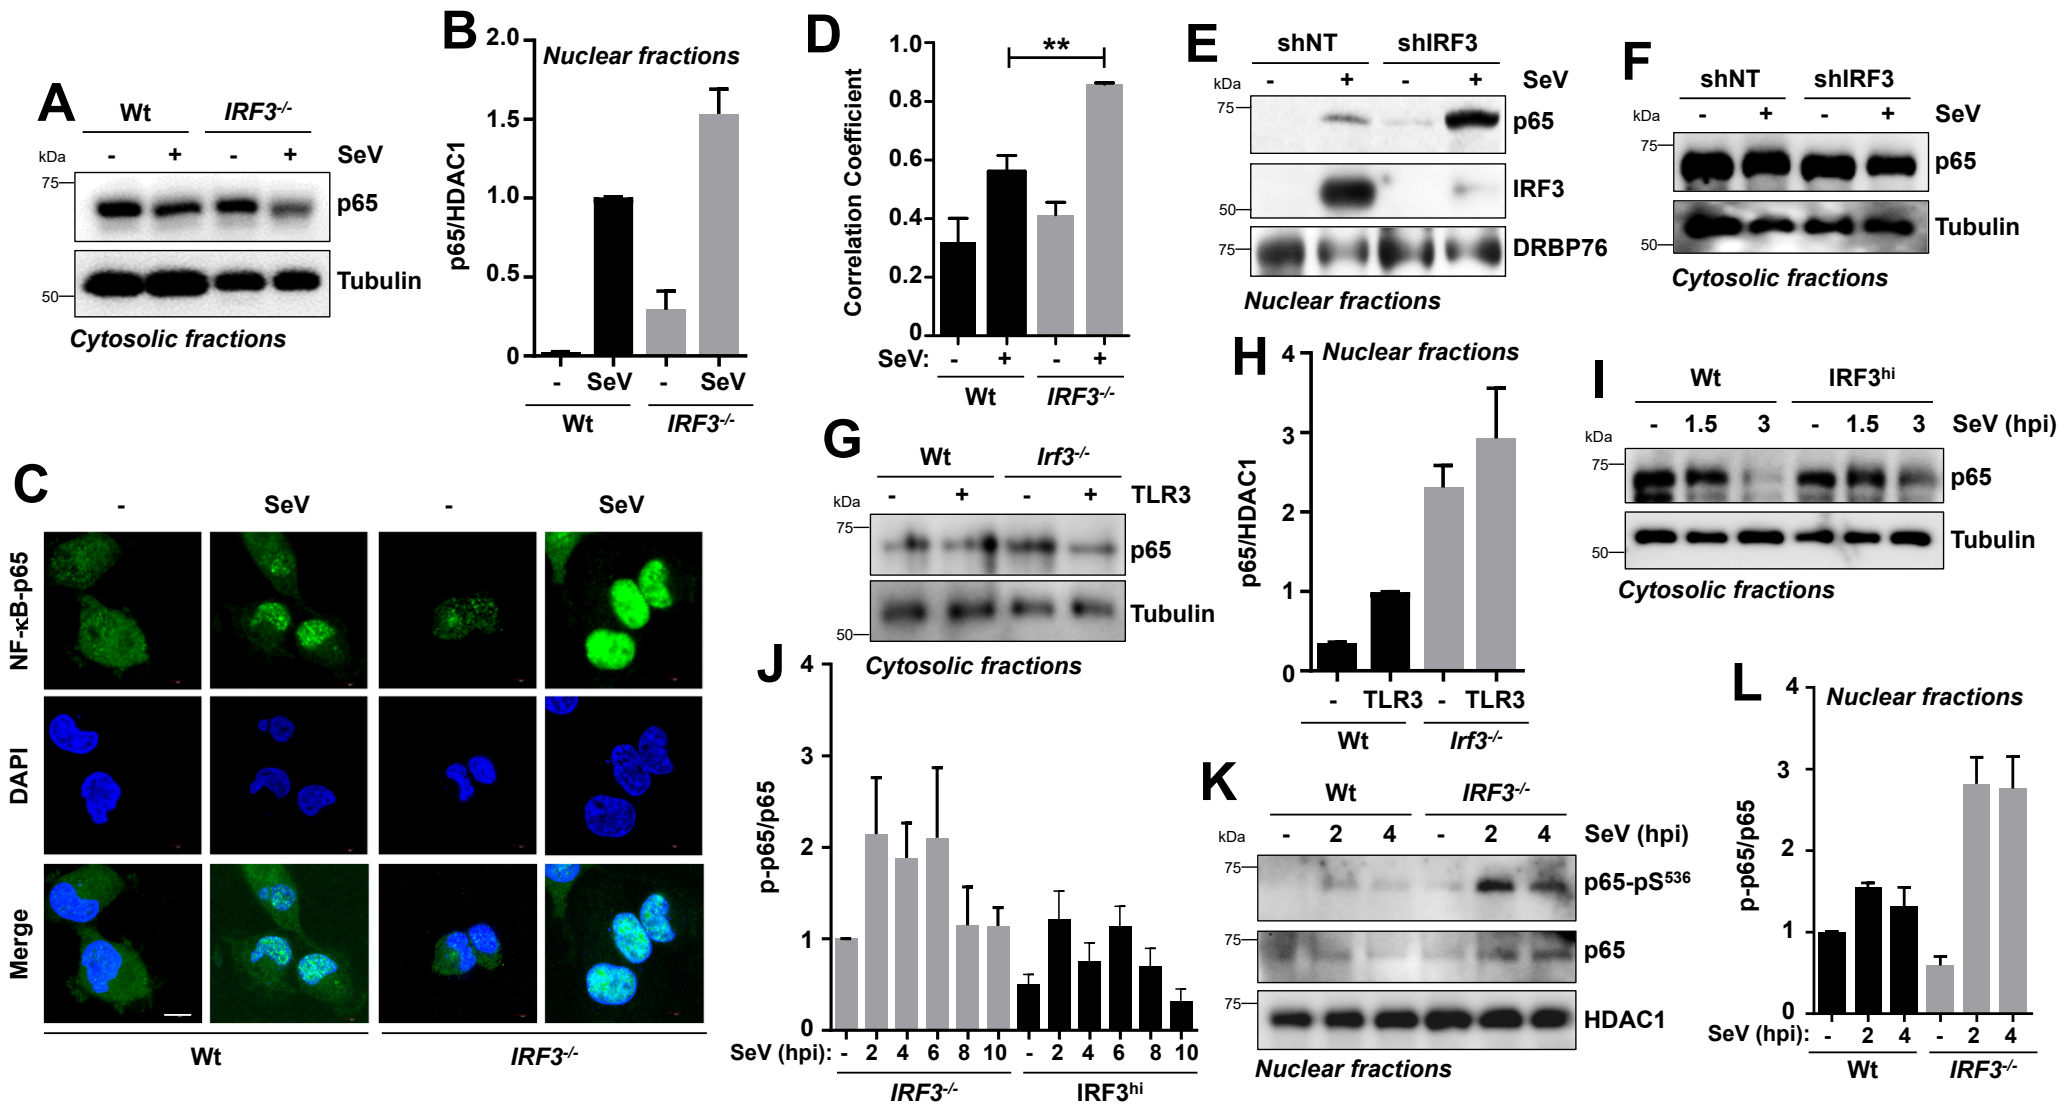

**Fig S5. IRF3 deficiency causes increased NF-κB-p65 nuclear translocation.** (A) The cytosolic fractions of Wt or *IRF3*<sup>-/-</sup> HT1080 cells were analyzed for p65 upon SeV infection (for 2h) by immunoblot. (B) Densitometric analyses of the nuclear fractions in Fig 5A. (C, D) Confocal microscopy of NF-κB-p65 in Wt or *IRF3*<sup>-/-</sup> HT1080 cells, upon SeV infection 2 hpi (C). The Pearson's correlation coefficient values were calculated from 10-20 cells using three images for each dataset (D). (E, F) HT1080 cells, expressing shRNA against IRF3 or a non-targeting (NT) sequence, were infected with SeV for 2h, when the nuclear and cytosolic fractions were analyzed for NF-κB-p65 and IRF3, by immunoblot. (G) The cytosolic fractions of Wt or *Irf3*<sup>-/-</sup> iBMDMs were analyzed for p65 upon poly:I:C stimulation (TLR3, for 2h) by immunoblot. (H) Densitometric analyses of the nuclear fractions in Fig 5B. (I) The cytosolic fractions of Wt or *IRF3*<sup>hi</sup> HT1080 cells were analyzed for p65 upon SeV infection (for 2h) by immunoblot. (J) Densitometric analyses of the nuclear fractions in Fig 5D. (K, L) The nuclear fractions from Wt or *IRF3*<sup>-/-</sup> HT1080 cells were analyzed for phospho-p65 (on Ser<sup>536</sup>) upon SeV infection (at the indicated time) by immunoblot and densitometric analyses were performed (L). HDAC1 and DRBP76 are markers of nuclear fractions, tubulin is a marker of cytosolic fractions. The results are representative of three experiments; the data represent mean ± SEM, scale bar is 10 μm, \* represents p<0.05.

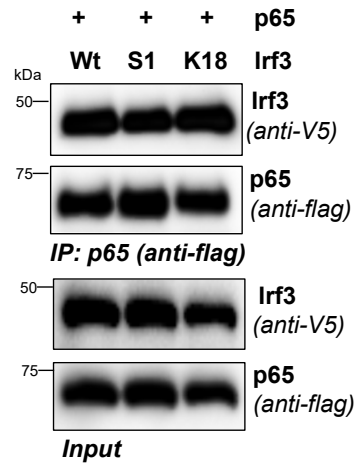

**Fig S6. Transcription and RIPA-inactive IRF3 mutants interact with NF- $\kappa$ B-p65.** Co-IP analyses of NF- $\kappa$ B-p65 with Wt or mutants of mouse Irf3 in SeV-infected HEK293T cells 2 hpi. The results are representative of three experiments.

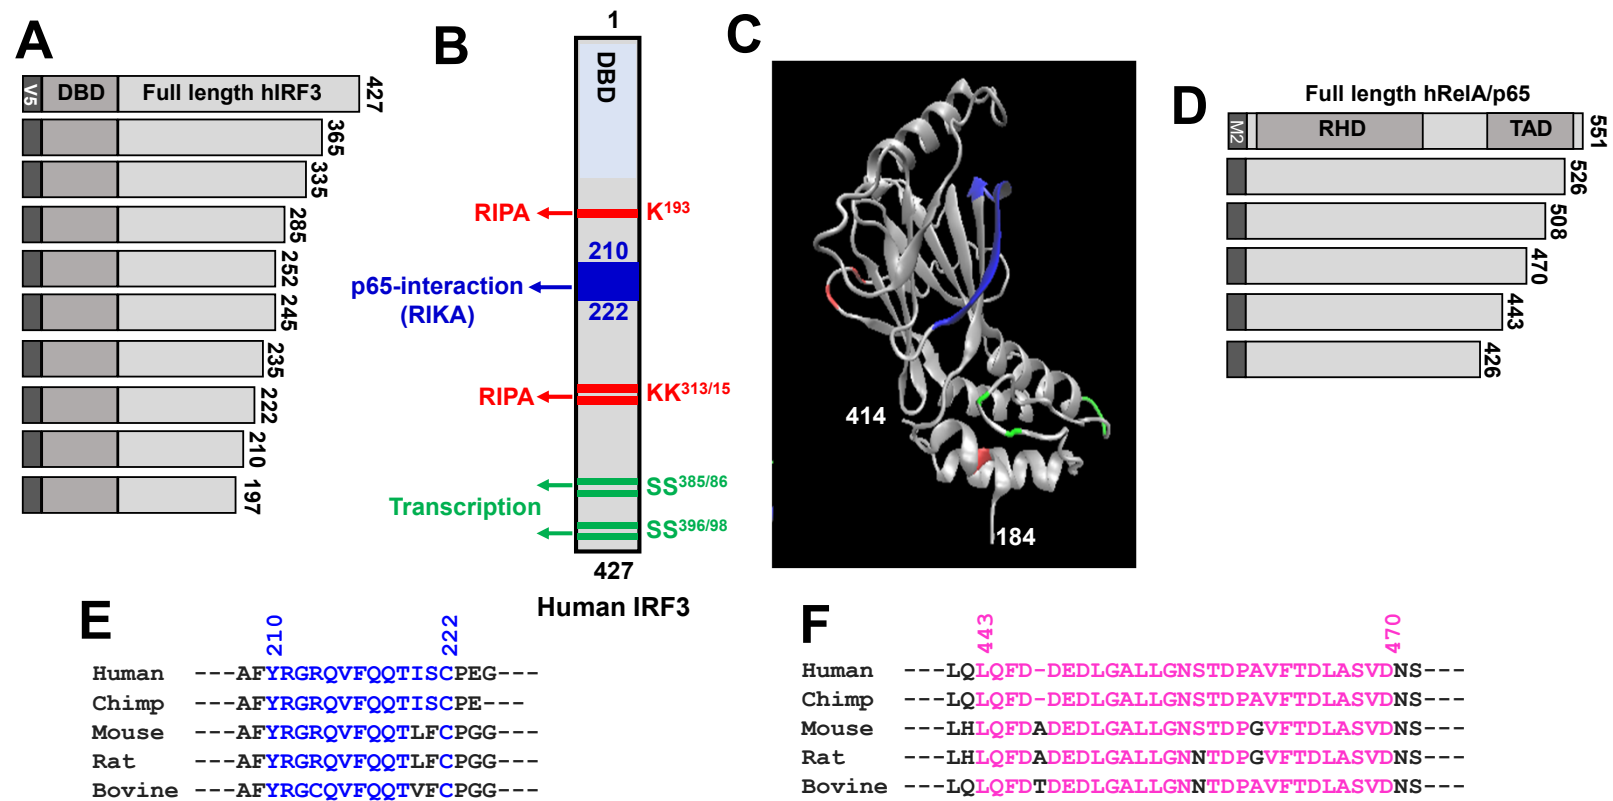

**Fig S7. Mapping the interacting domain of IRF3 with NF- $\kappa$ B-p65.** (A) Wt (full length) or the C-terminal deletion mutants of V5-IRF3 are shown. (B, C) A cartoon showing the critical domains and residues of IRF3 for pathway-specific functions (B), and a 3D-structural model showing the domains and residues involved (using colors as in B) in these functions (C). (D) A cartoon showing the Wt (full length) and the deletion mutants of Flag-NF- $\kappa$ B-p65. (E, F) The alignment of the interacting domains of IRF3 (E) and NF- $\kappa$ B-p65 (F) across multiple species.

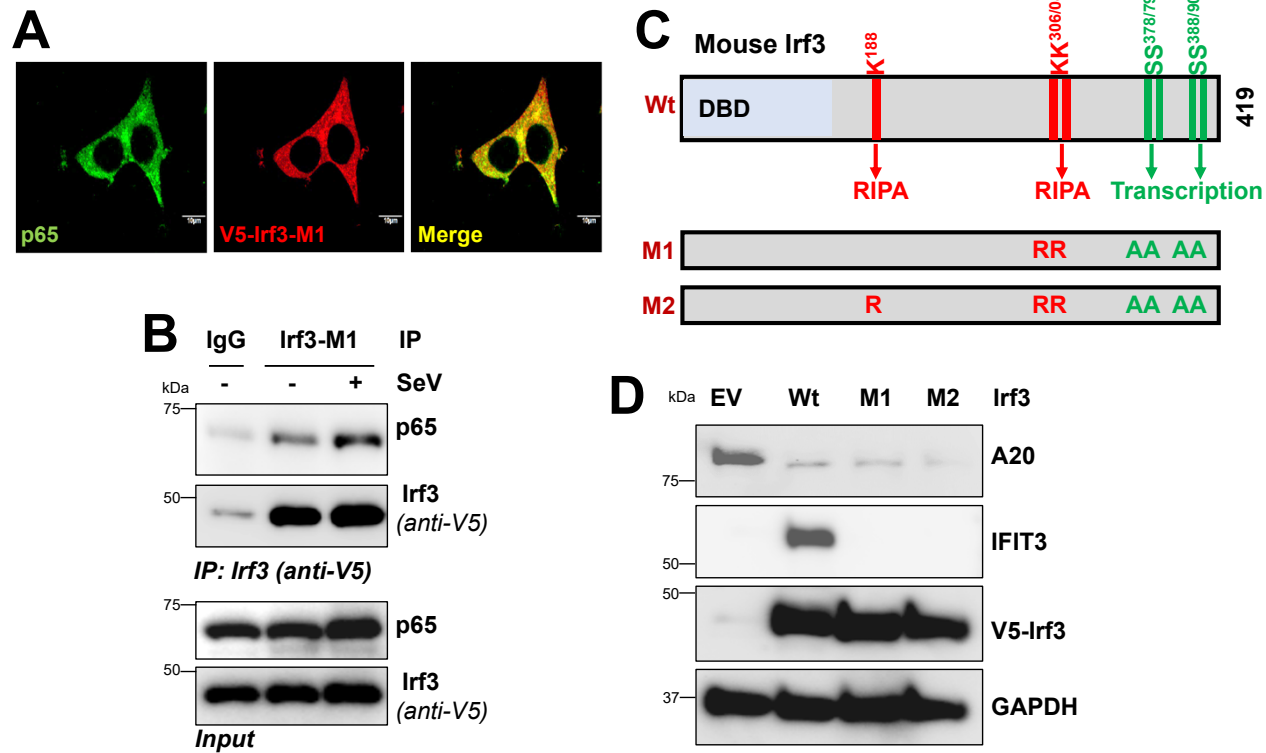

**Fig S8. Transcription and RIPA-inactive IRF3 mutants interact with NF- $\kappa$ B-p65 to trigger RIKK.** (A) Confocal microscopy of endogenous NF- $\kappa$ B-p65 and V5-Irf3-M1, expressed in *Irf3*<sup>-/-</sup> iBMDMs, upon SeV infection. (B) V5-Irf3-M1-expressing *Irf3*<sup>-/-</sup> iBMDMs were infected with SeV for 2h and subjected to co-IP analyses for the endogenous NF- $\kappa$ B-p65 and V5-Irf3. (C) A cartoon showing mouse Irf3 and its critical residues and domains (DBD, DNA-binding domain) involved in specific functions, and the pathway-specific mutants (Irf3-M1 and Irf3-M2). (D) *IRF3*<sup>-/-</sup> HT1080 cells, ectopically expressing Wt or mutants of Irf3, were analyzed for SeV-induced A20 and IFIT3 expression by immunoblot. EV, empty vector, IgG, mouse-IgG control, scale bar is 10  $\mu$ m. The results are representative of three experiments.



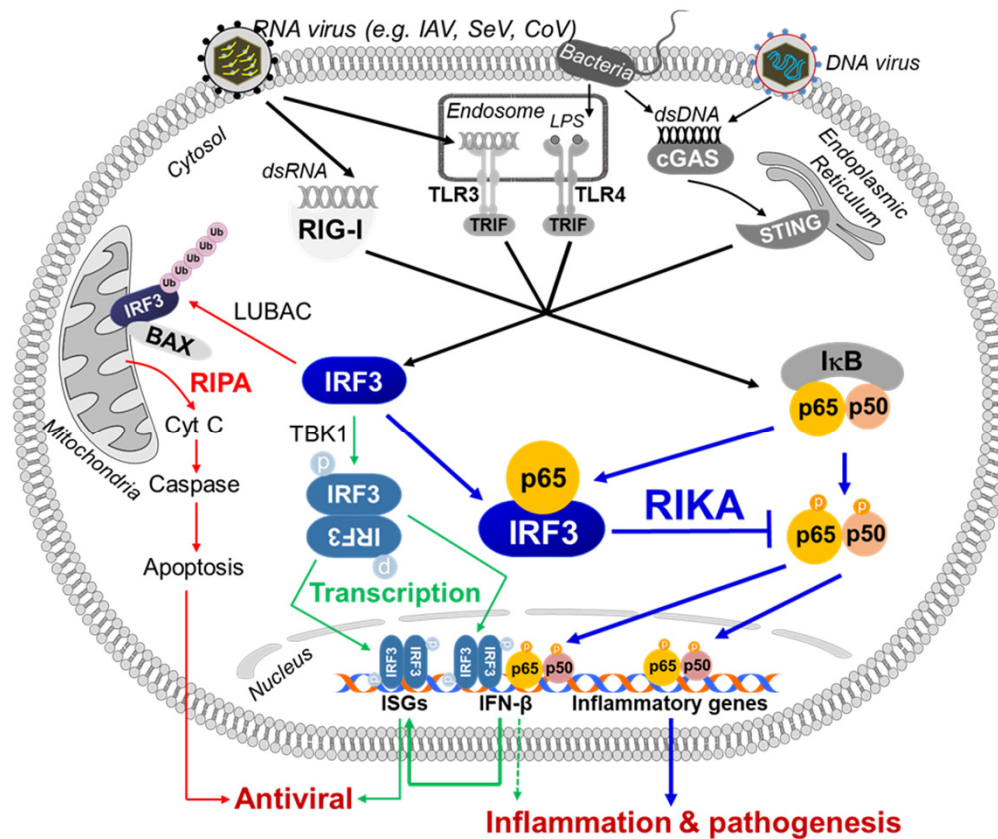

**Fig S9. A diagram showing the transcriptional and non-transcriptional activities of IRF3 and their contribution to the optimal IRF3 functions.** IRF3 is activated by phosphorylation upon virus infection or non-viral stimulations, e.g., TLR, RLR, STING agonists, and leads to the transcriptional induction of IFN $\beta$  and ISGs. In addition, IRF3 can be activated by ubiquitination, leading to the apoptotic pathway (RIPA). We present a new function of IRF3, independent of transcriptional and apoptotic activities, to interact with NF- $\kappa$ B-p65 and suppress the inflammatory gene induction. All functions of IRF3 contribute to the optimal antiviral protection by IRF3.

**Table S1: NF- $\kappa$ B-induced genes in shIRF3 (KD) and HT1080 (Wt) (related to Fig 3A)**

| <b>NF-<math>\kappa</math>B genes</b> | <b>Fold change: sh/Wt</b> |
|--------------------------------------|---------------------------|
| KLK3                                 | 196.9929033               |
| IL1A                                 | 94.96295172               |
| IL1B                                 | 91.4640133                |
| CCL3                                 | 87.91478486               |
| SAA2                                 | 71.27476863               |
| SERPINA1                             | 45.93270513               |
| BDKRB1                               | 37.96351908               |
| TRAF1                                | 28.24778537               |
| CCL20                                | 26.43912875               |
| SAA1                                 | 20.12267502               |
| VCAM1                                | 19.89421722               |
| CSF2                                 | 19.25653874               |
| MMP9                                 | 19.09260206               |
| TNFAIP2                              | 19.01841279               |
| SERPINA1                             | 14.10842222               |
| HMOX1                                | 13.5813153                |
| SOD2                                 | 11.26723576               |
| LTA                                  | 9.892589922               |
| CYP7B1                               | 9.76422339                |
| EBI3                                 | 9.367252192               |
| WT1                                  | 8.076774429               |
| NFKBIE                               | 6.986852872               |
| BCL3                                 | 6.728656968               |
| IER3                                 | 6.704942085               |
| ADORA2A                              | 6.325605493               |
| TFF3                                 | 6.027897897               |
| PRKACA                               | 5.93503615                |
| CYP19A1                              | 4.797237073               |
| CD209                                | 4.726011969               |
| MMP1                                 | 4.667810051               |
| CD86                                 | 4.144855922               |
| KLF10                                | 3.927415896               |
| IL1RN                                | 3.917471991               |
| SPP1                                 | 3.701070682               |
| NFKB2                                | 3.623371378               |
| JUNB                                 | 3.602130605               |
| BIRC2                                | 3.585966267               |
| IL8                                  | 3.460348937               |

|         |             |
|---------|-------------|
| F8      | 3.257978518 |
| TNFAIP3 | 2.894124912 |
| CD44    | 2.870663071 |
| VEGFC   | 2.842875892 |
| KLRA1   | 2.590343509 |
| XDH     | 2.536365254 |
| EGFR    | 2.523901768 |
| PTX3    | 2.49906675  |
| BCL2A1  | 2.486793963 |
| ST6GAL1 | 2.388519689 |
| ABCC6   | 2.37879039  |
| PLK3    | 2.20888794  |
| GADD45B | 2.200838305 |
| CDKN1A  | 2.194691637 |
| CCND1   | 2.169038163 |
| CYP27B1 | 2.165445187 |
| TIFA    | 2.152993774 |
| ERBB2   | 2.147598874 |
| PRKCD   | 2.142779812 |
| RELB    | 2.107647886 |
| TNF     | 2.063232069 |
| CD44    | 2.059770392 |
| GAD1    | 2.059536049 |
| BCL2L1  | 2.047113621 |
| F11R    | 2.037749724 |
| GCLM    | 2.022333429 |
| ADORA1  | 2.012507826 |

**Table S2: Fold induction of NF- $\kappa$ B-induced genes**

| <b>NF-<math>\kappa</math>B genes</b> | <b>Fold induction: sh/Wt</b> |
|--------------------------------------|------------------------------|
| TRAF1                                | 73.19554003                  |
| SERPINA1                             | 52.92263536                  |
| PRKACA                               | 37.26449849                  |
| SAA2                                 | 34.21258641                  |
| KLK3                                 | 33.04454369                  |
| SERPINA1                             | 24.27998141                  |
| CCL20                                | 18.82830566                  |
| IL1B                                 | 17.8325929                   |
| IL1A                                 | 11.26685933                  |
| ADORA2A                              | 8.73585222                   |
| SOD2                                 | 8.520655008                  |
| TNFAIP2                              | 8.500042078                  |
| F8                                   | 7.729624812                  |
| IER3                                 | 7.002416048                  |
| ERBB2                                | 6.750214991                  |
| MMP1                                 | 6.7126701                    |
| KLRA1                                | 6.678493412                  |
| LTA                                  | 6.023500586                  |
| PTX3                                 | 5.789770282                  |
| CD86                                 | 4.846703998                  |
| IL1RN                                | 4.798852341                  |
| HMOX1                                | 4.625338261                  |
| KLF10                                | 4.405793437                  |
| BCL3                                 | 4.102645875                  |
| CD44                                 | 3.390627864                  |
| CD44                                 | 3.390627864                  |
| SAA1                                 | 3.316628643                  |
| TNFAIP3                              | 3.25359055                   |
| EBI3                                 | 3.236702681                  |
| BIRC2                                | 2.93578609                   |
| CYP19A1                              | 2.530422275                  |
| EGFR                                 | 2.368144464                  |
| TIFA                                 | 2.341340552                  |
| MMP9                                 | 2.29109528                   |
| PLK3                                 | 2.066256022                  |
| GADD45B                              | 1.994307678                  |
| BCL2L1                               | 1.98364452                   |

**Table S3: The qRT-PCR primers used in the study**

| Gene           | Primers (Fwd, Rev)                                   |
|----------------|------------------------------------------------------|
| <i>TNFAIP3</i> | CGTCCAGGTTCCAGAACACCATT, TGCGCTGGCTCGATCTCAGTTG      |
| <i>Tnfaip3</i> | TTTGCTACGACACTCGGAAC, TTCTGAGGATGTTGCTGAGG           |
| <i>IL1a</i>    | ACTGCCCAAGATGAAGACCA, CCGTGAGTTTCCCAGAAGAA           |
| <i>Il1a</i>    | GTGTTGCTGAAGGAGTTGCCAGAA, TGCACCCGACTTTGTTCTTTGGT    |
| <i>IL1b</i>    | AAATACCTGTGGCCTTGGGC, TTTGGGATCTACTCTCCAGCT          |
| <i>Il1b</i>    | ACACATGTTCTCTGGGAAATCGT, AAGTGCATCATCGTTGTTTCATACA   |
| <i>IL6</i>     | GTAGCCGCCCCACACAGA, CATGTCTCCTTTCTCAGGGCTG           |
| <i>Il6</i>     | GACGGCACACCCACCCT, AAACCGTTTTTCCATCTTCTTCTTT         |
| <i>CXCL1</i>   | AACCGAAGTCATAGCCACAC, GTTGGATTTGTCAGTTCAGC           |
| <i>Cxcl1</i>   | TGAGCTGCGCTGTCAGTGCCT, AGAAGCCAGCGTTCACCAGA          |
| <i>CXCL5</i>   | GAGAGCTGCGTTGCGTTTG, TTCCTTGTTTCCACCGTCGA            |
| <i>Cxcl5</i>   | GCATTTCTGTTGCTGTTTACGCTG, CCTCCTTCTGGTTTTTTCAGTTTAGC |
| SeV P          | CAAAAGTGAGGGCGAAGGAGAA, CGCCAGATCCTGAGATACAGA        |
| SeV genome     | ACTGGTCCGGATAAGAAGGC, AGTTCCTGATCAGACCCGTG           |
| MHV N          | GCCAAATAATCGCGCTAGAA, CCGAGCTTAGCCAAAACAAG           |
| IAV NP         | TGCAAGGTTCAACTCTCCCT, GTTCCGGCTCTCTCTCACTT           |
| <i>TNF</i>     | ATGAGCACTGAAAGCATGATCC, GAGGGCTGATTAGAGAGAGGTC       |
| <i>IL10</i>    | TCTCCGAGATGCCTTCAGCAGA, TCAGACAAGGCTTGGCAACCCA       |
| <i>IL13</i>    | ACGGTCATTGCTCTCACTTGCC, CTGTCAGGTTGATGCTCCATACC      |
| <i>Il10</i>    | AAGGCAGTGGAGCAGGTGAA, CCAGCAGACTCAATACACAC           |
| <i>IFIT1</i>   | Described before (1)                                 |
| <i>IFIT3</i>   | Described before (1)                                 |
| <i>IFNB1</i>   | Described before (1)                                 |
| 18S            | Described before (1)                                 |

1. S. Chattopadhyay, T. Kuzmanovic, Y. Zhang, J. L. Wetzel, G. C. Sen, Ubiquitination of the Transcription Factor IRF-3 Activates RIPA, the Apoptotic Pathway that Protects Mice from Viral Pathogenesis. *Immunity* **44**, 1151-1161 (2016).
